# Supplementary material for: Acidic C-terminal domains autoregulate the RNA chaperone Hfq
Source: eLife journal article supplement (doi:10.7554/elife.27049), 2017-08-09
Supplement: supp [file elife-27049-supp-v1.zip]

Archive with 18 entries (18 files):
- elife_poa_e27049_Figure_2_figure_supplement_1.jpg
- elife_poa_e27049_Source_Code_File_2._extend_terminus.py.py
- elife_poa_e27049_Figure_4_figure_supplement_2.jpg
- elife_poa_e27049_Figure_1_Figure_Supplement_1.pdf
- elife_poa_e27049_Figure_5_Figure_Supplement_2.jpg
- elife_poa_e27049_Figure_6_Figure_Supplement_3.jpg
- elife_poa_e27049_Supplementary_File_1.pdf
- elife_poa_e27049_Figure_6_Figure_Supplement_1.tif
- elife_poa_e27049_Figure_2_Figure_Supplement_3.jpg
- elife_poa_e27049_Figure_5_Figure_Supplement_1.jpg
- elife_poa_e27049_Figure_6_figure_supplement_2.jpg
- elife_poa_e27049_Figure_4_figure_supplement_1.jpg
- elife_poa_e27049_Figure_2_Supplement_2.tif
- elife_poa_e27049_Figure_1_Figure_Supplement_2.pdf
- elife_poa_e27049_Source_Code_File_1._convert_to_beta.py.py
- elife_poa_e27049_Figure_1_Figure_Supplement_3.tif
- elife_poa_e27049_Transparent_Reporting_File.docx
- elife_poa_e27049_Source_Code_File_3._identify_interactions.py.py
