# Supplementary material for: Acidic C-terminal domains autoregulate the RNA chaperone Hfq
Source: eLife journal article supplement (doi:10.7554/elife.27049), 2017-08-09

**A**

Tree scale: 0.1

**Firmicutes**

**Group 6**

*Peptococcus*

*Desulfotomaculum*

**Group 7**

*Lysinibacillus*

*Paenibacillus*

*Bacillus*

**Group 5**

*Clostridium*

**Alpha-proteobacteria**

**Group 4**

*Bartonella*

*Roseobacter*

**Group 3**

*Novosphigobium*

*Erythrobacter*

*Staphylococcus*

*Burkholderia*

*Psychrobacter*

*Acinetobacter*

**Group 2**

*Neisseria*

*Nitrosomonas*

*Rhizobacter*

**Beta-proteobacteria**

*Haemophilus*

*Xanthomonas*

*Shewanella*

*Escherichia*

*Vibrio*

**Group 1**

*Pseudomonas*

**Gamma-proteobacteria**

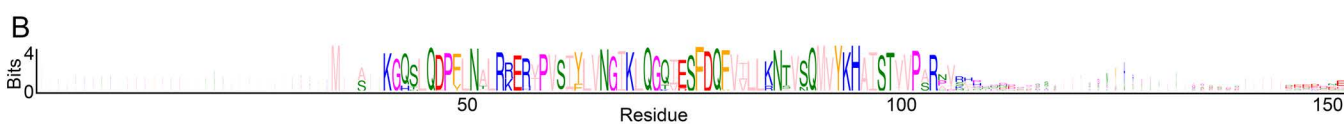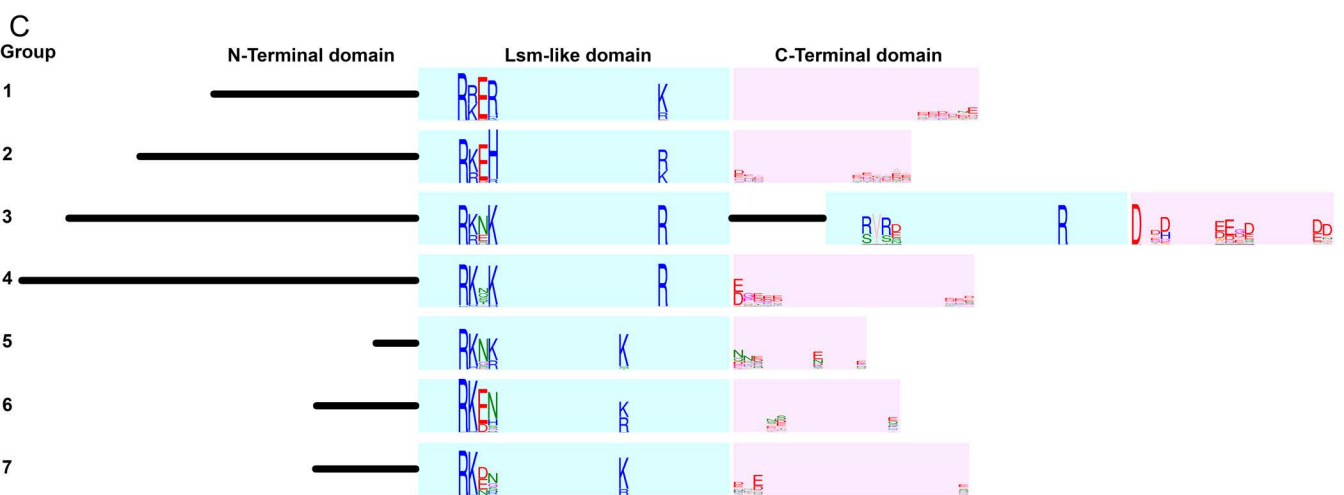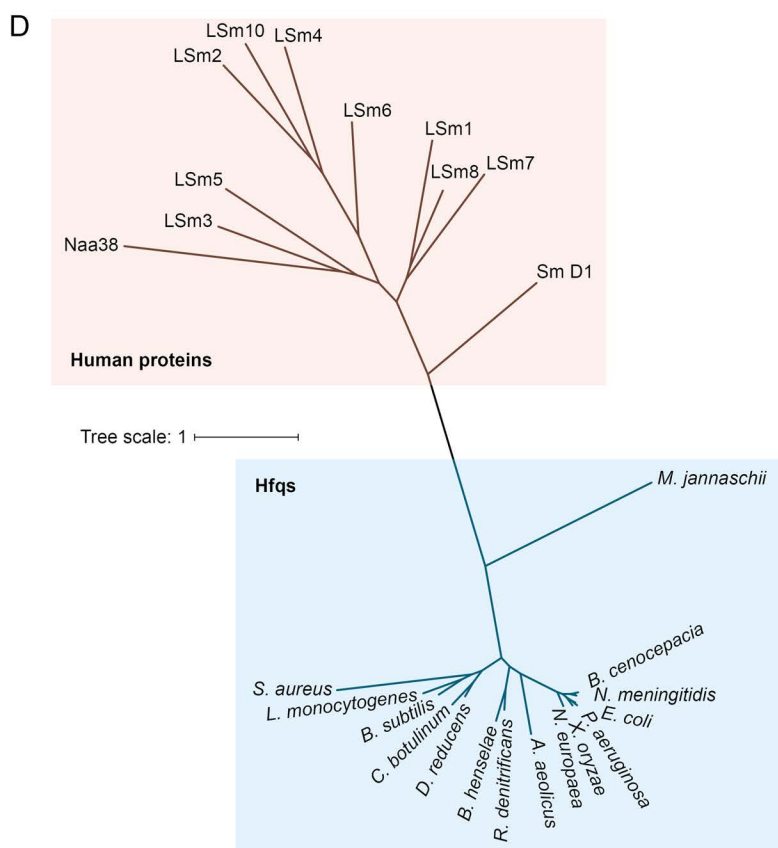

Supplement: supp [file elife-27049-supp-v1.zip › elife_poa_e27049_Figure_1_Figure_Supplement_1.pdf]
