# Supplementary figures and images for: Acidic C-terminal domains autoregulate the RNA chaperone Hfq
Source: eLife journal article supplement (doi:10.7554/elife.27049), 2017-08-09

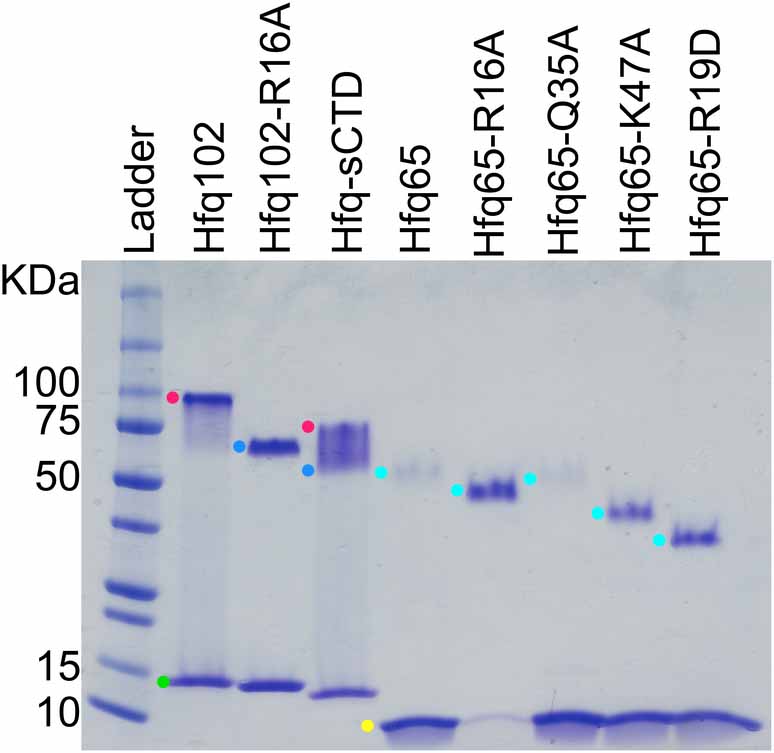

Supplement: supp [file elife-27049-supp-v1.zip › elife_poa_e27049_Figure_2_figure_supplement_1.jpg]

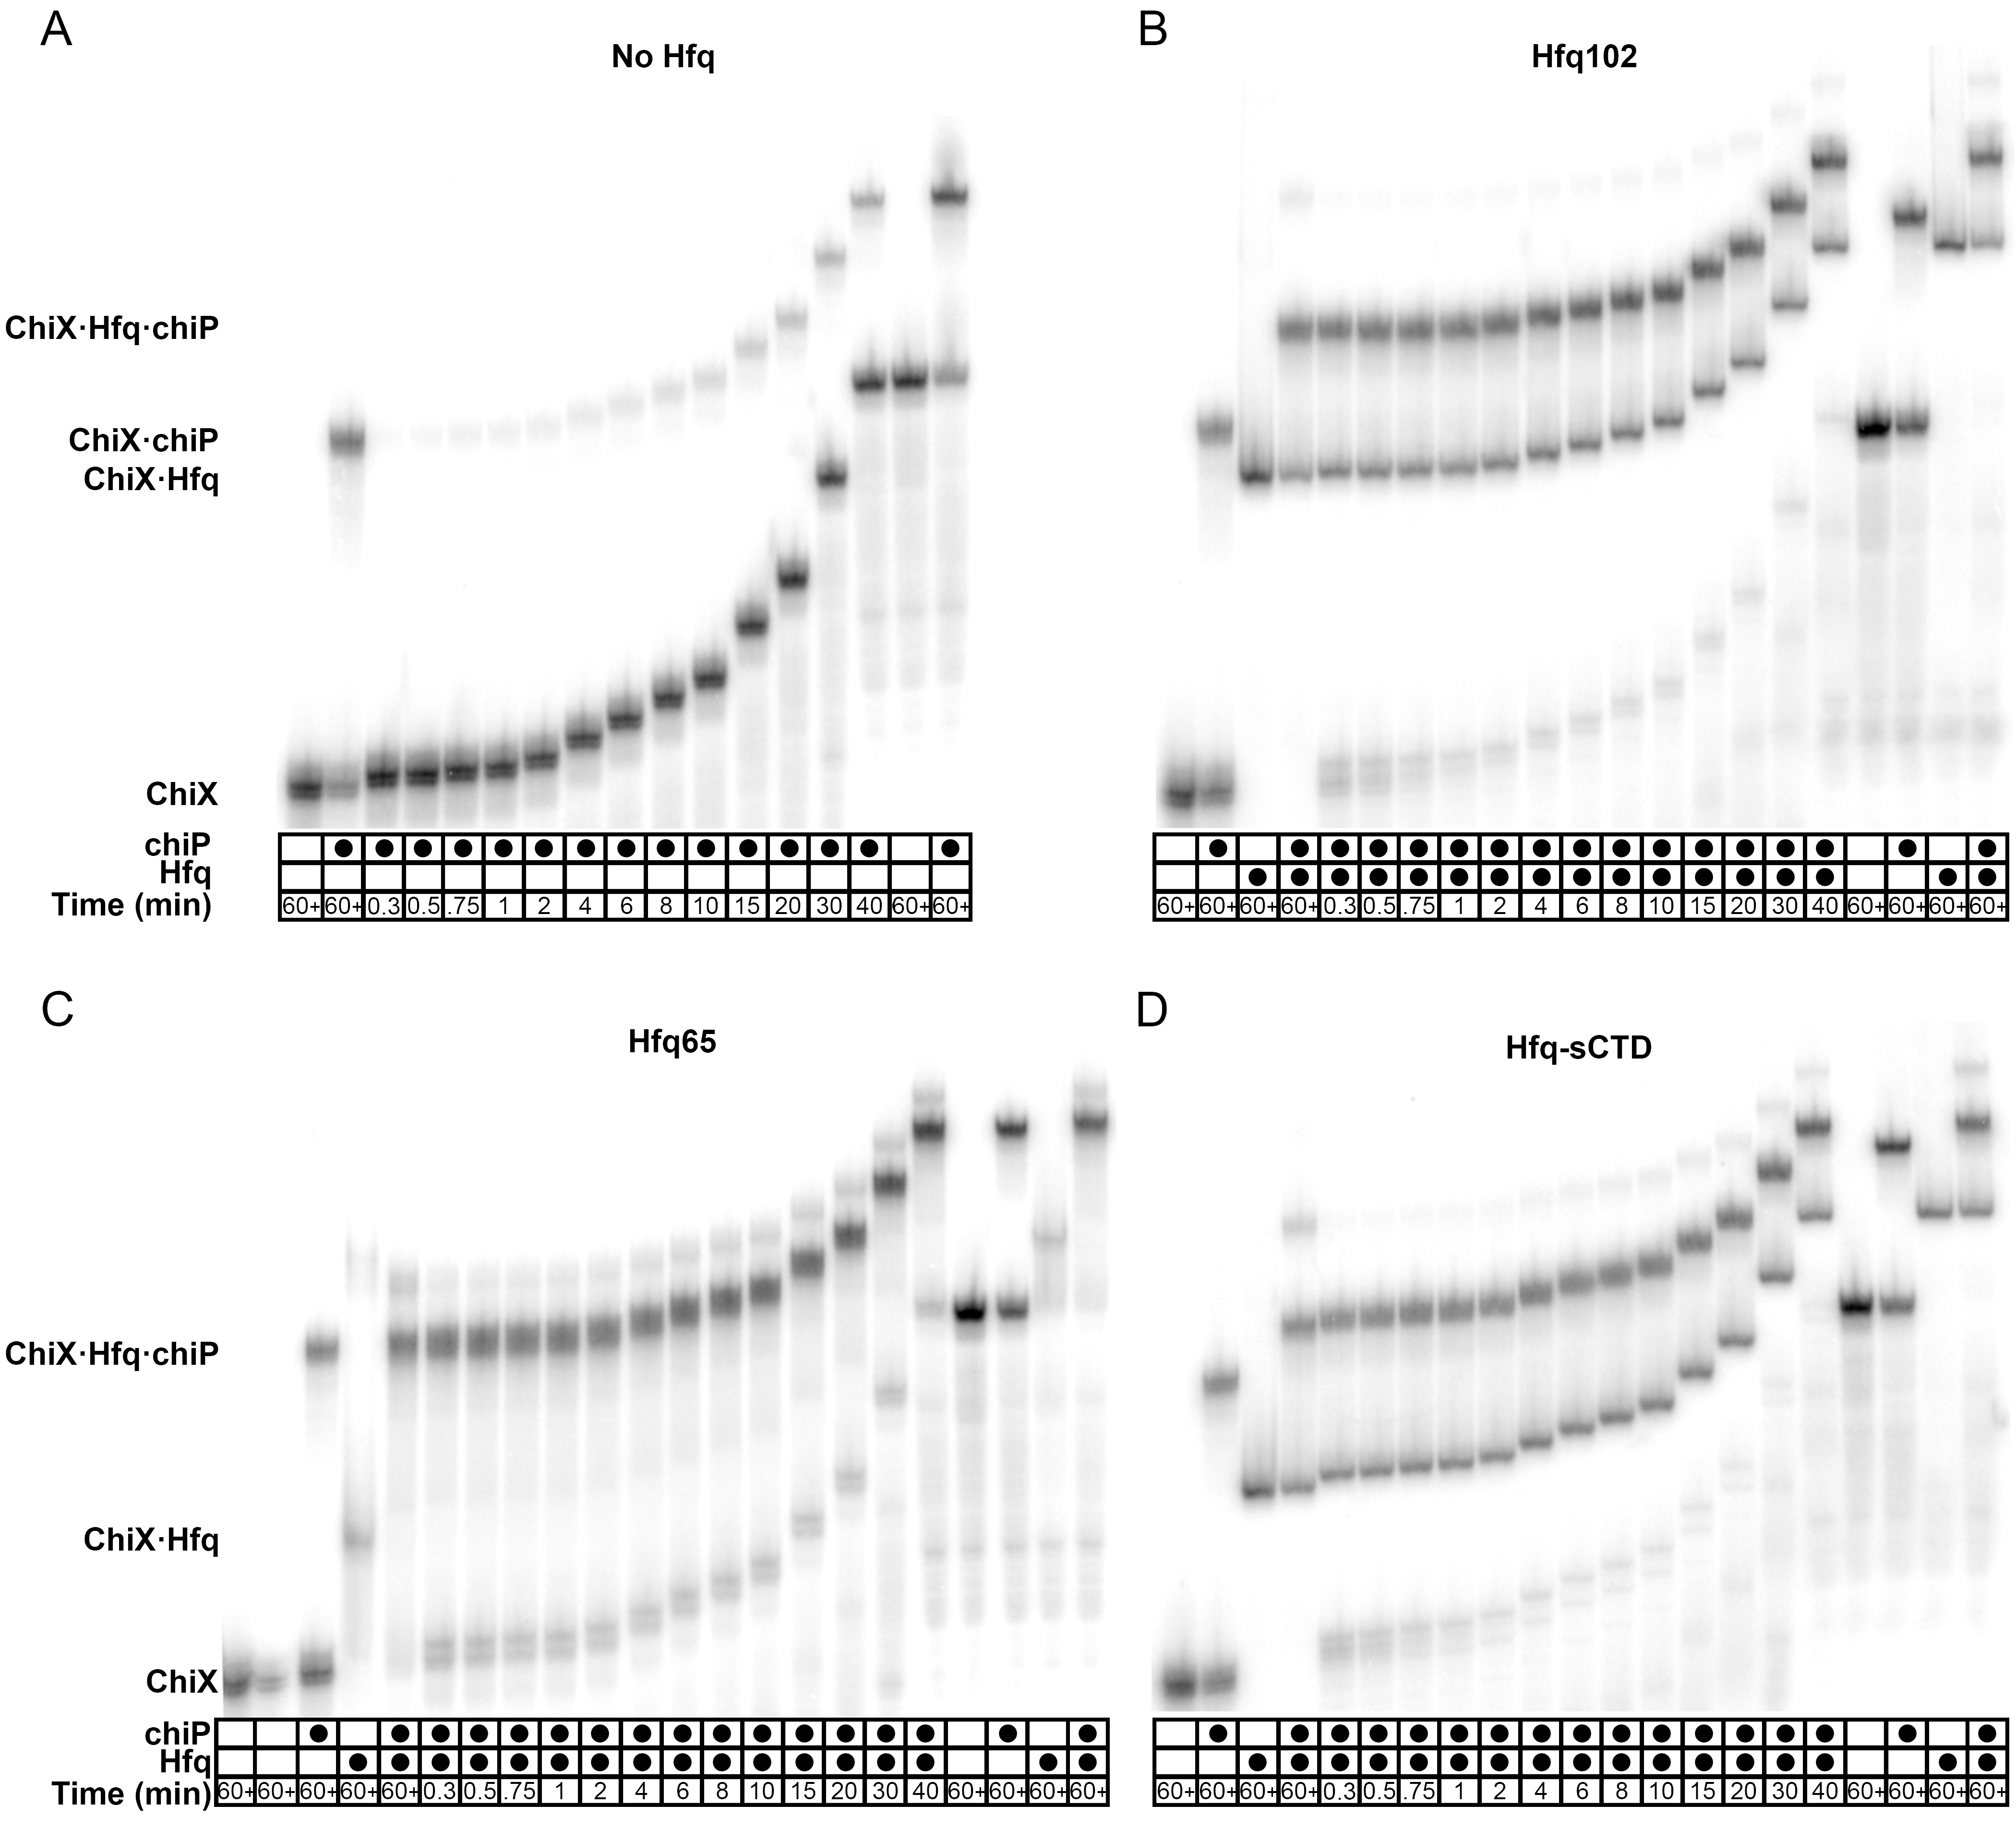

Supplement: supp [file elife-27049-supp-v1.zip › elife_poa_e27049_Figure_4_figure_supplement_2.jpg]

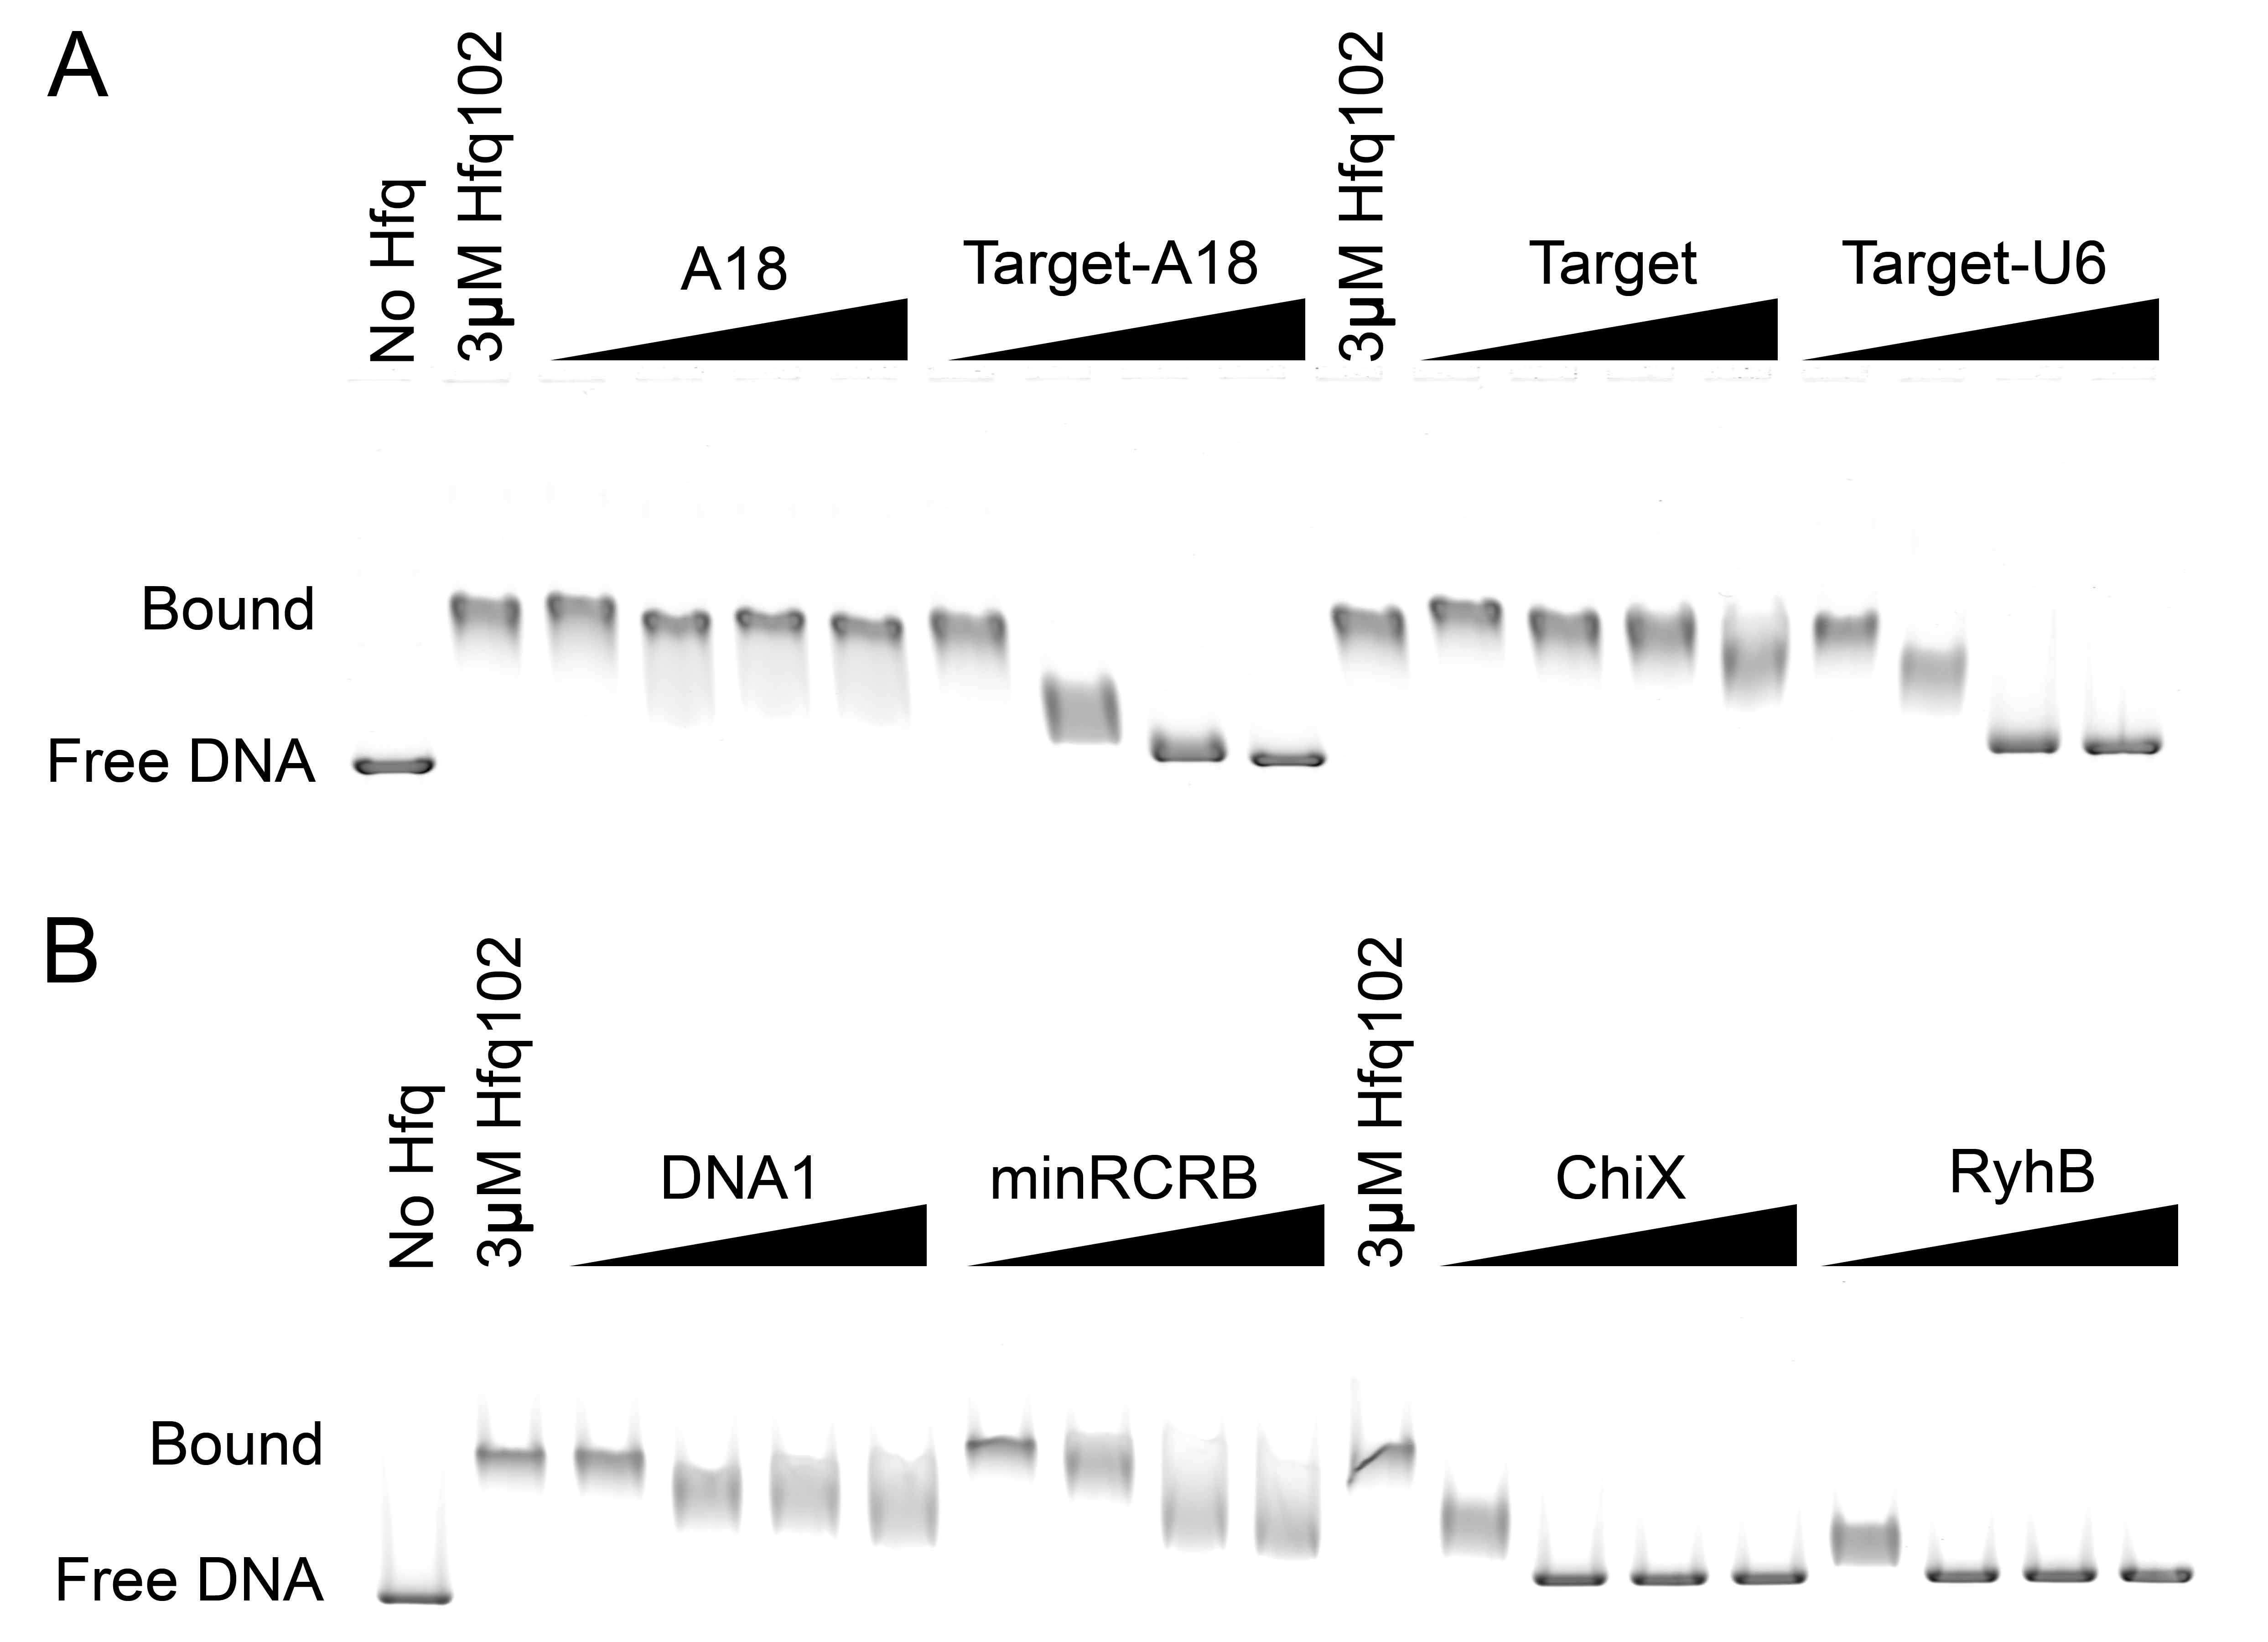

Supplement: supp [file elife-27049-supp-v1.zip › elife_poa_e27049_Figure_5_Figure_Supplement_2.jpg]

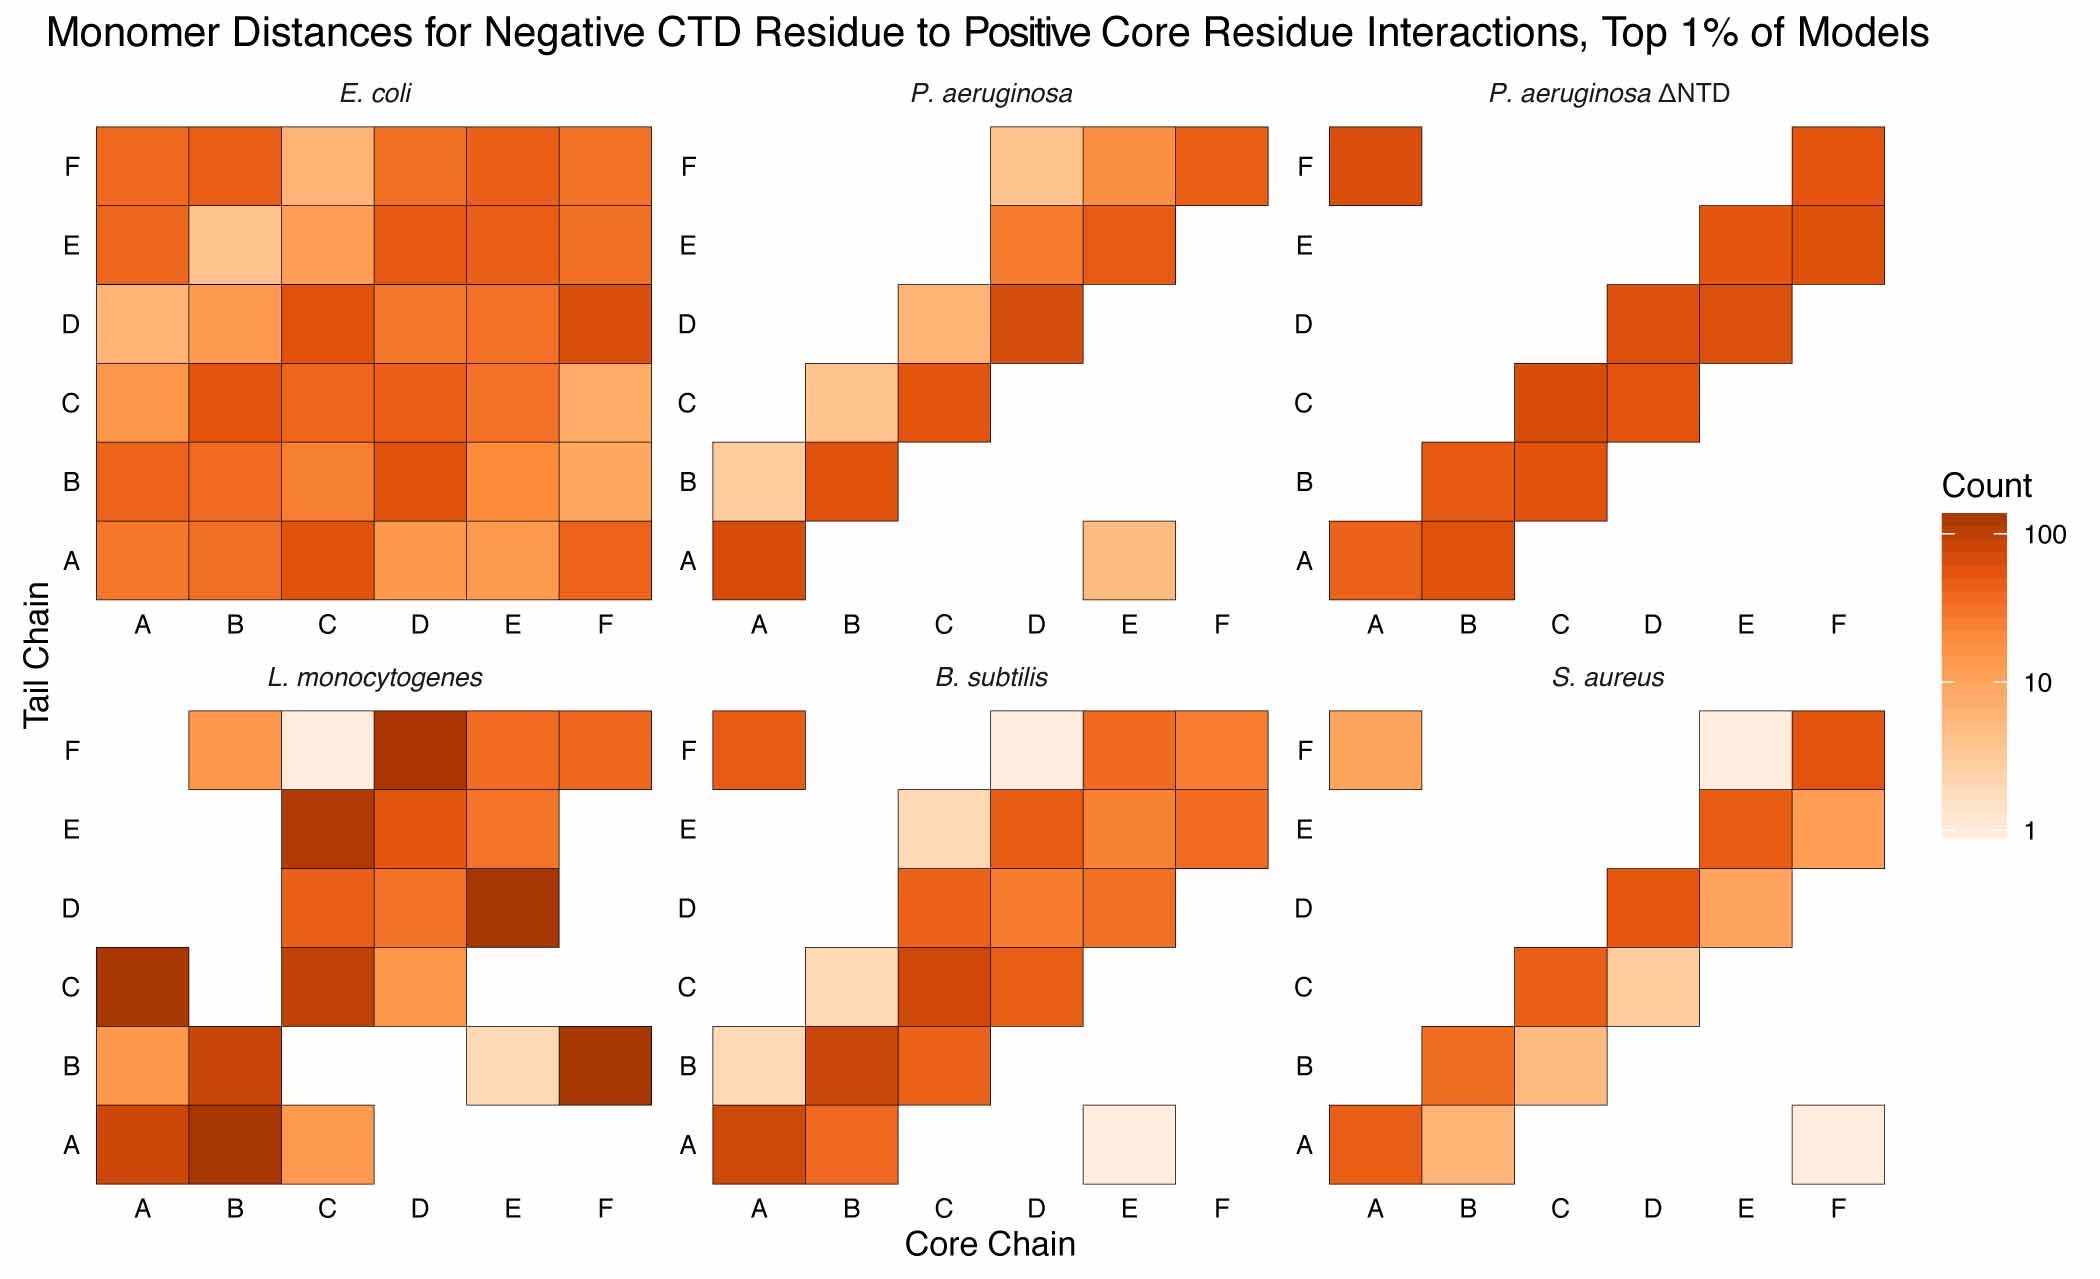

Supplement: supp [file elife-27049-supp-v1.zip › elife_poa_e27049_Figure_6_Figure_Supplement_3.jpg]

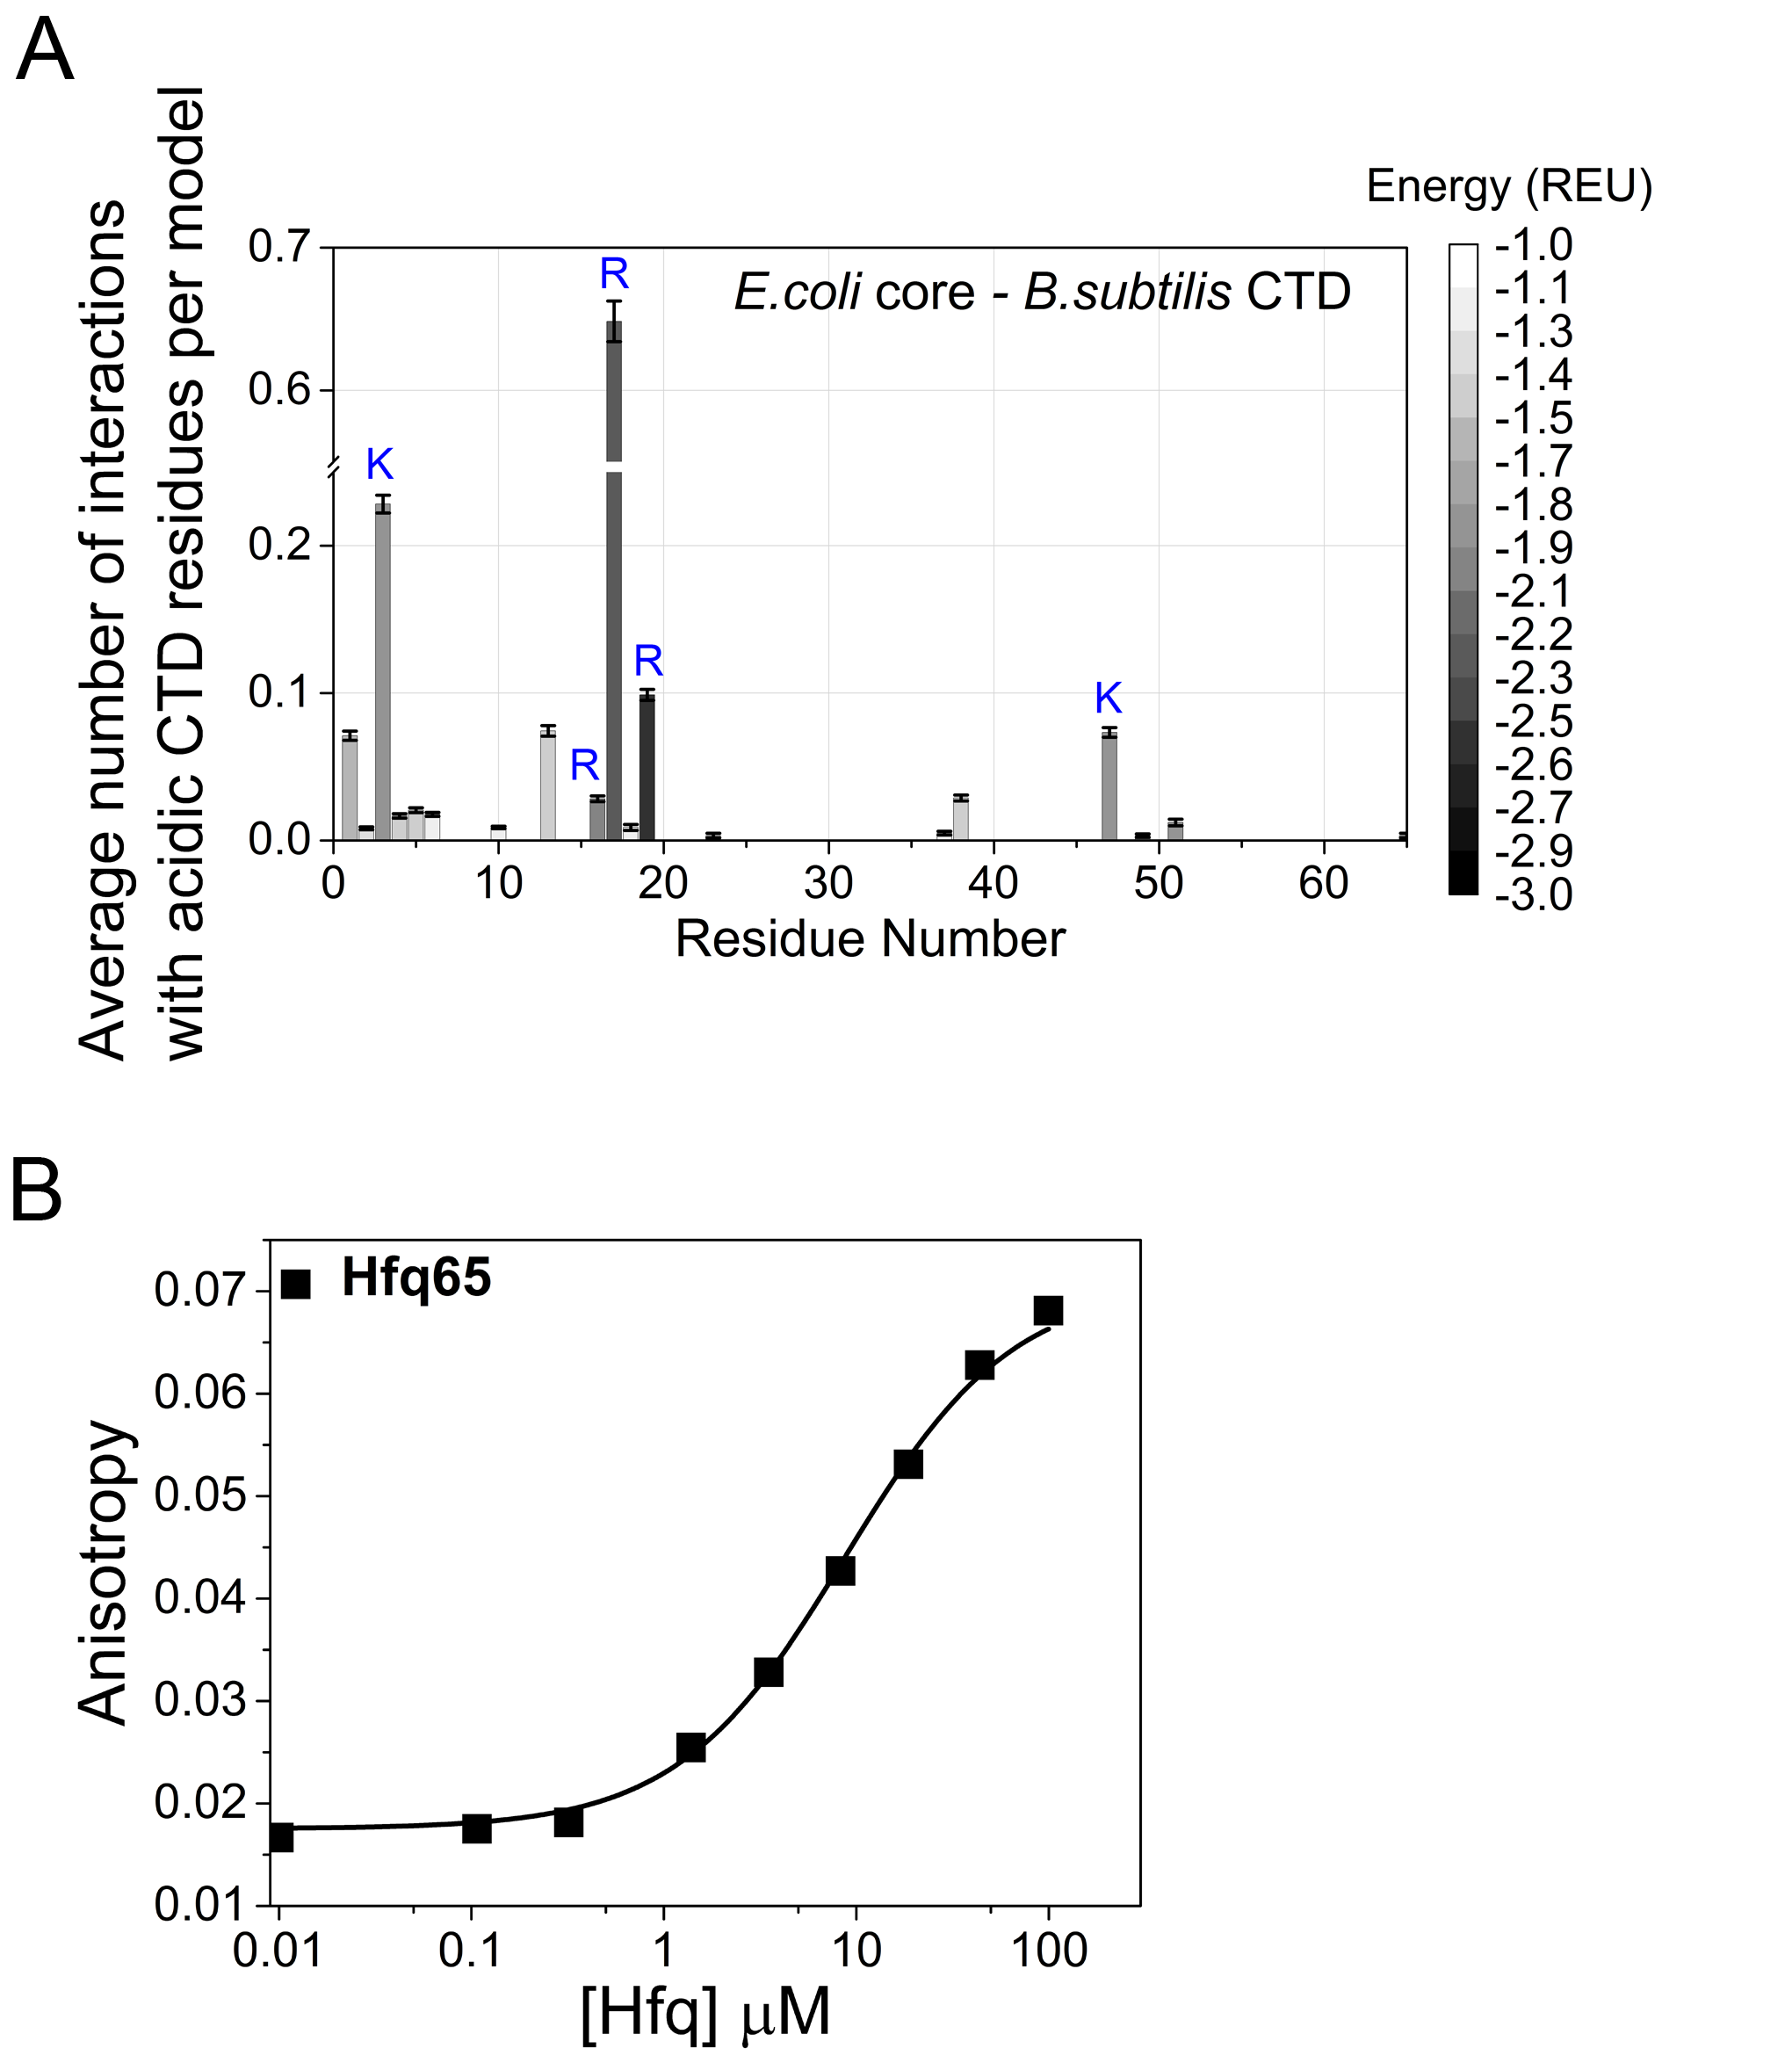

Supplement: supp [file elife-27049-supp-v1.zip › elife_poa_e27049_Figure_6_Figure_Supplement_1.tif]

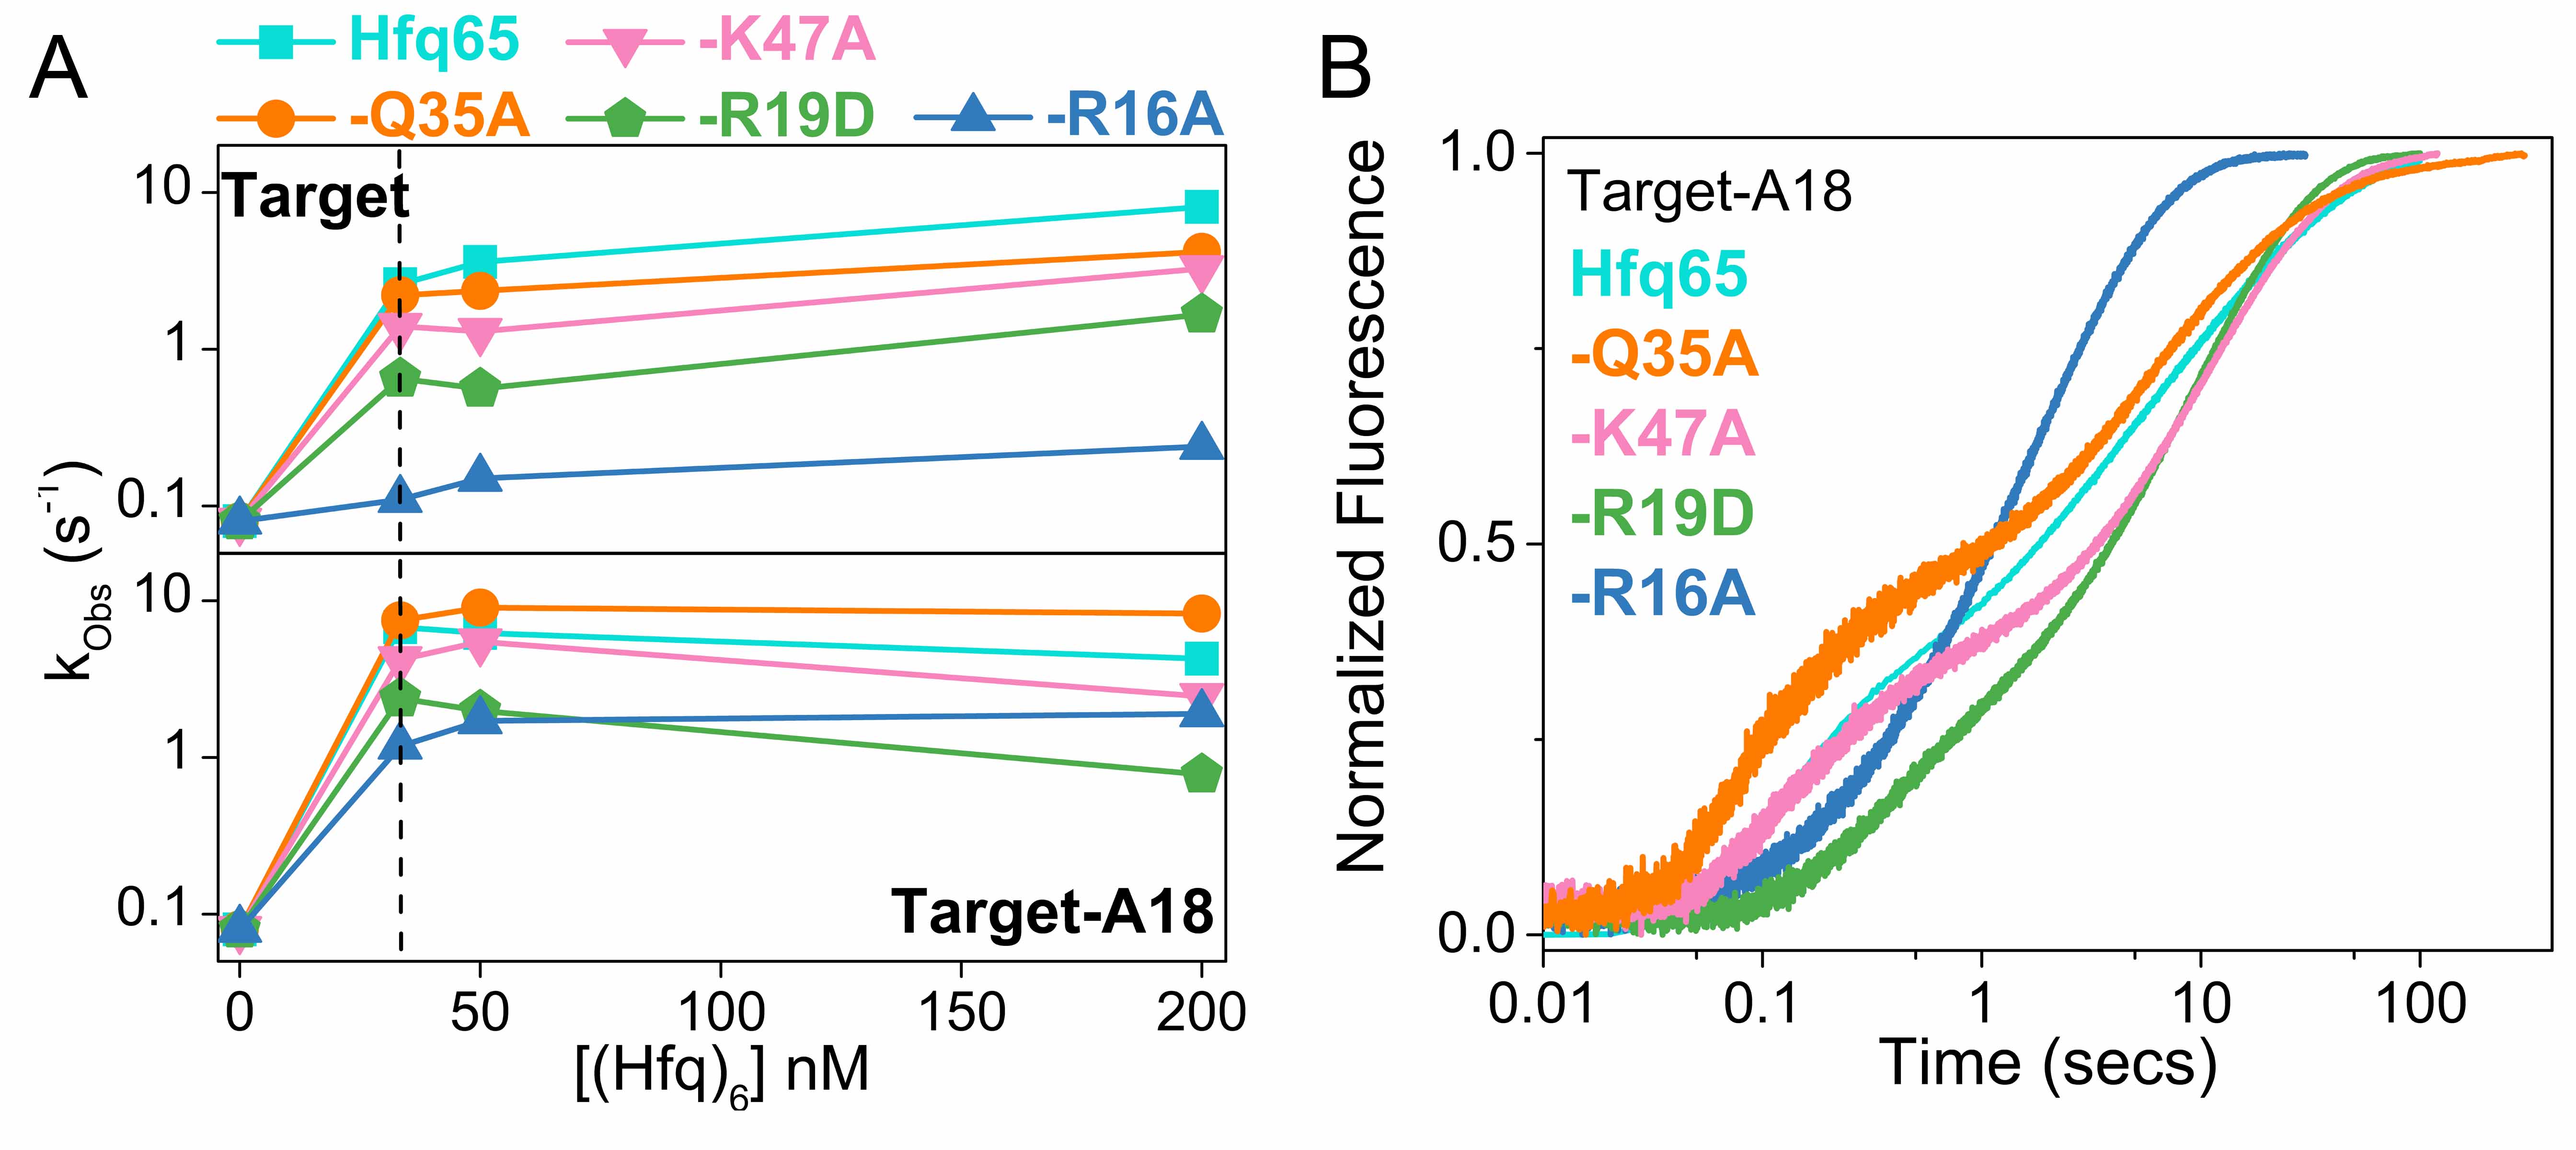

Supplement: supp [file elife-27049-supp-v1.zip › elife_poa_e27049_Figure_2_Figure_Supplement_3.jpg]

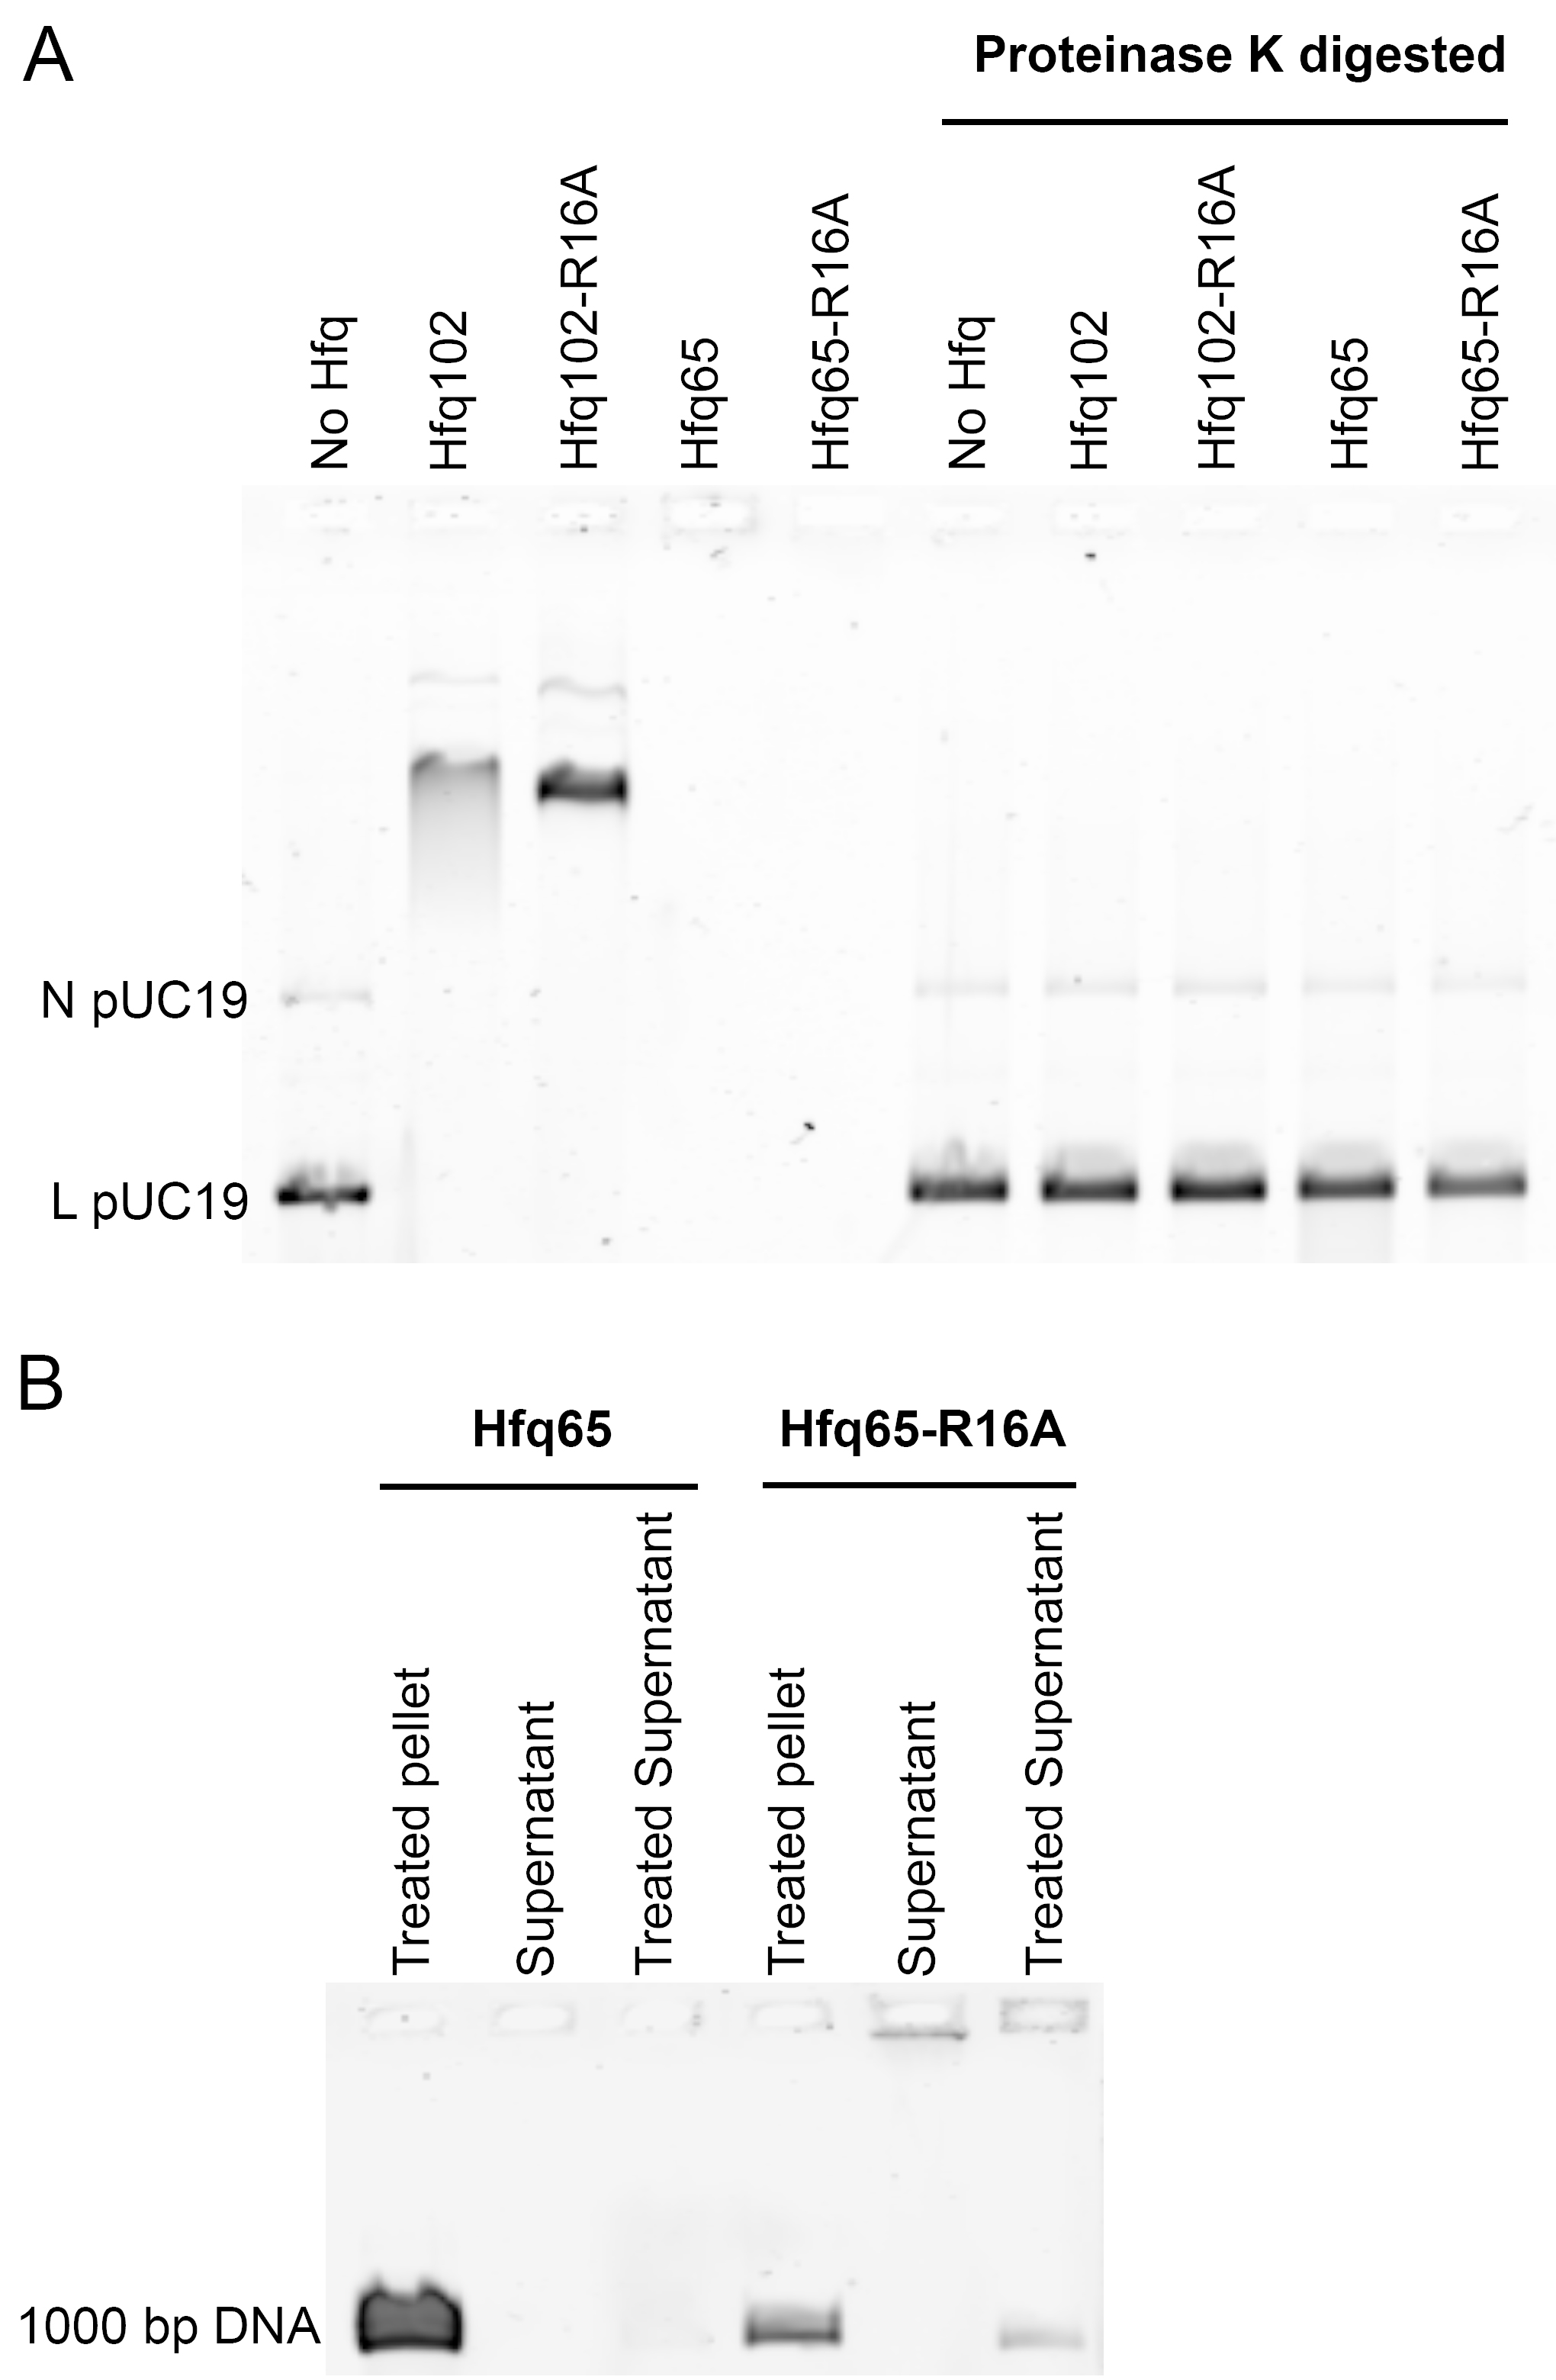

Supplement: supp [file elife-27049-supp-v1.zip › elife_poa_e27049_Figure_5_Figure_Supplement_1.jpg]

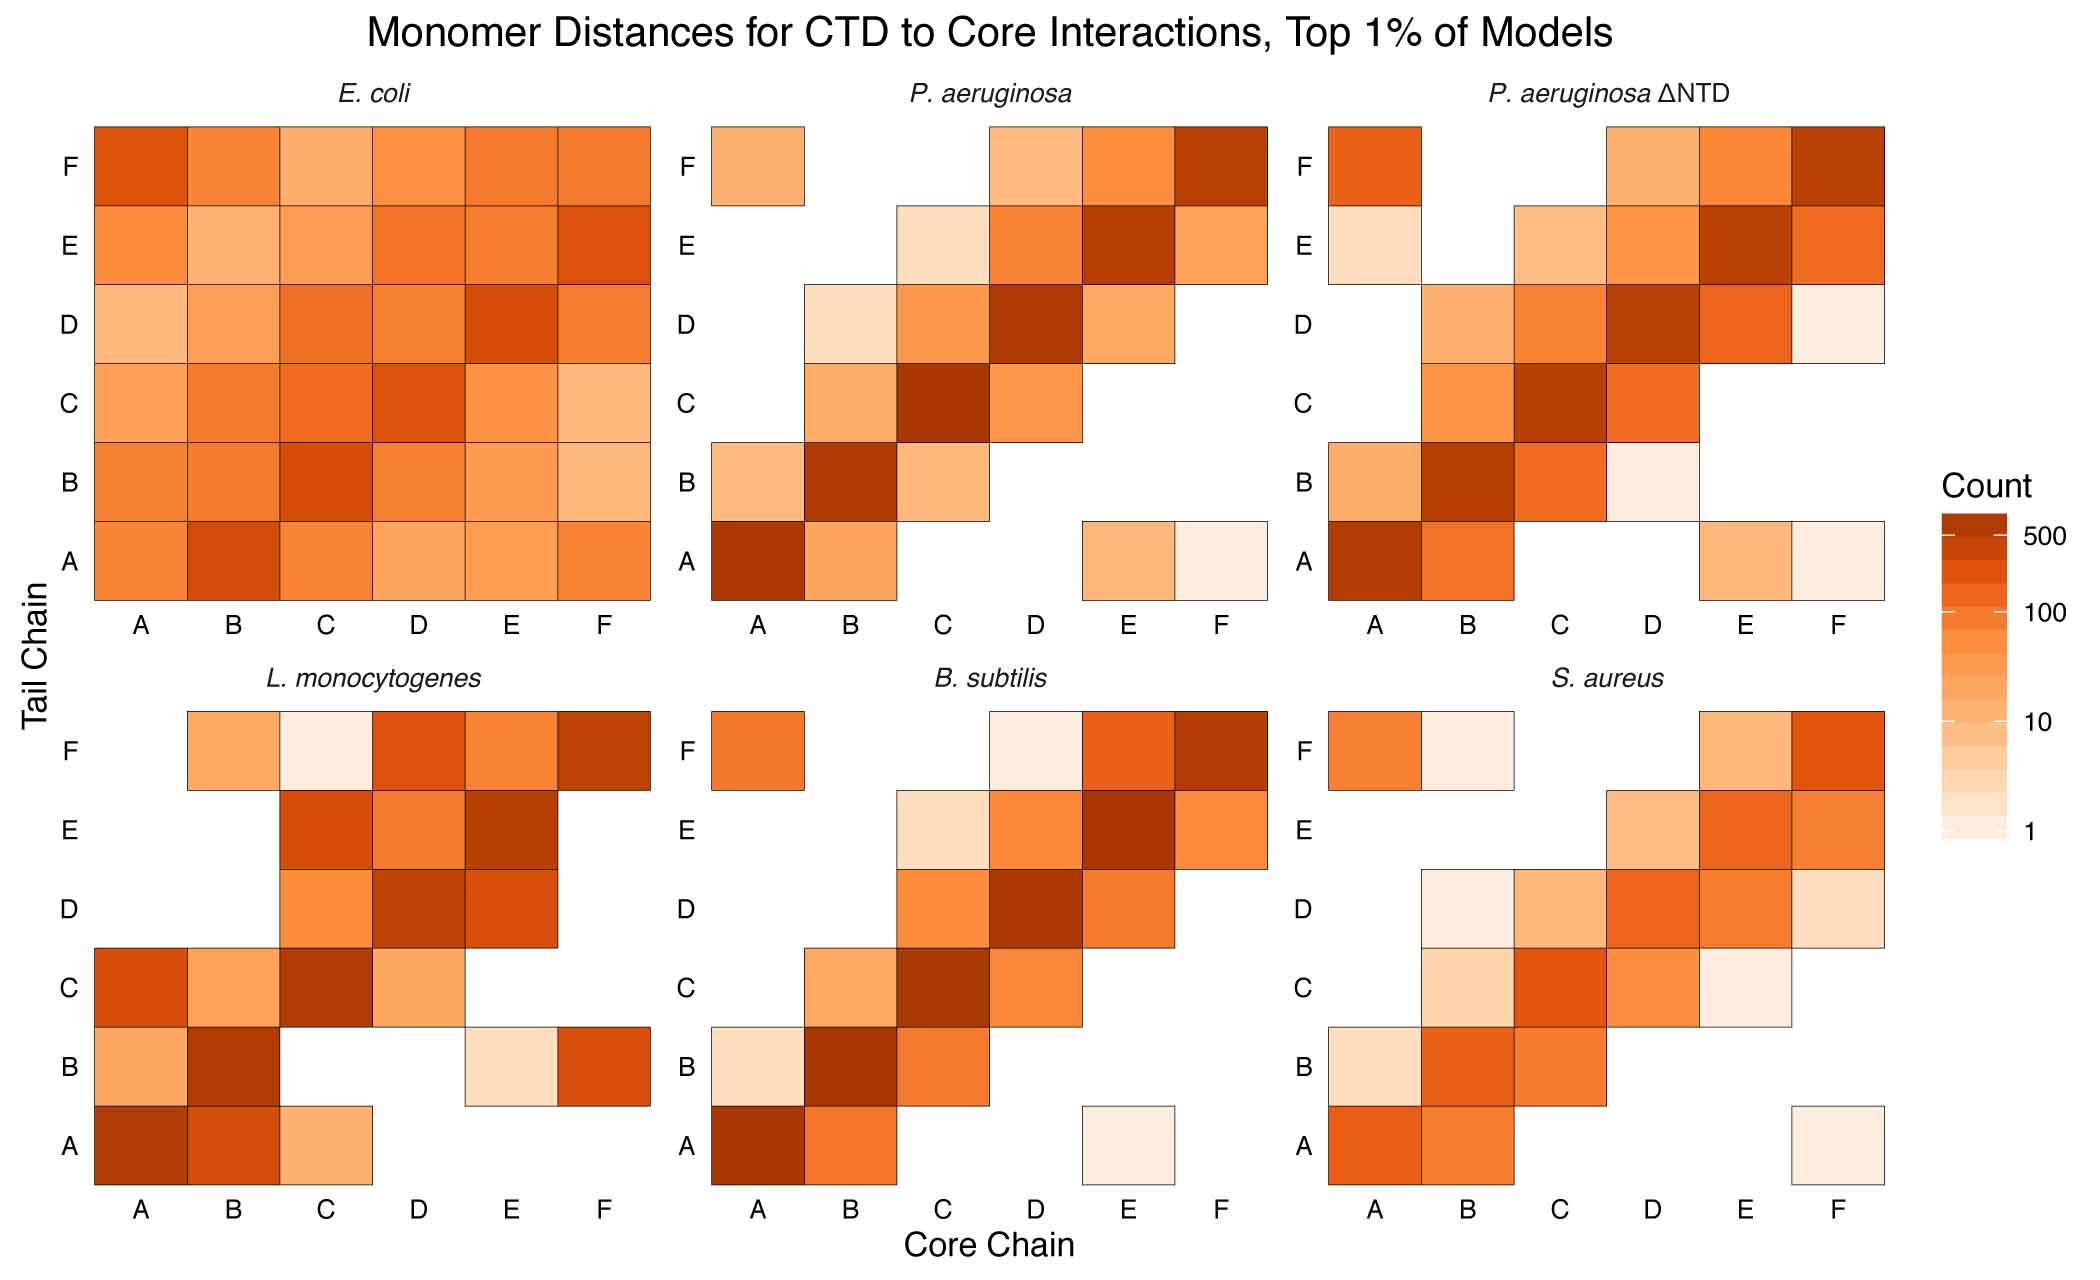

Supplement: supp [file elife-27049-supp-v1.zip › elife_poa_e27049_Figure_6_figure_supplement_2.jpg]

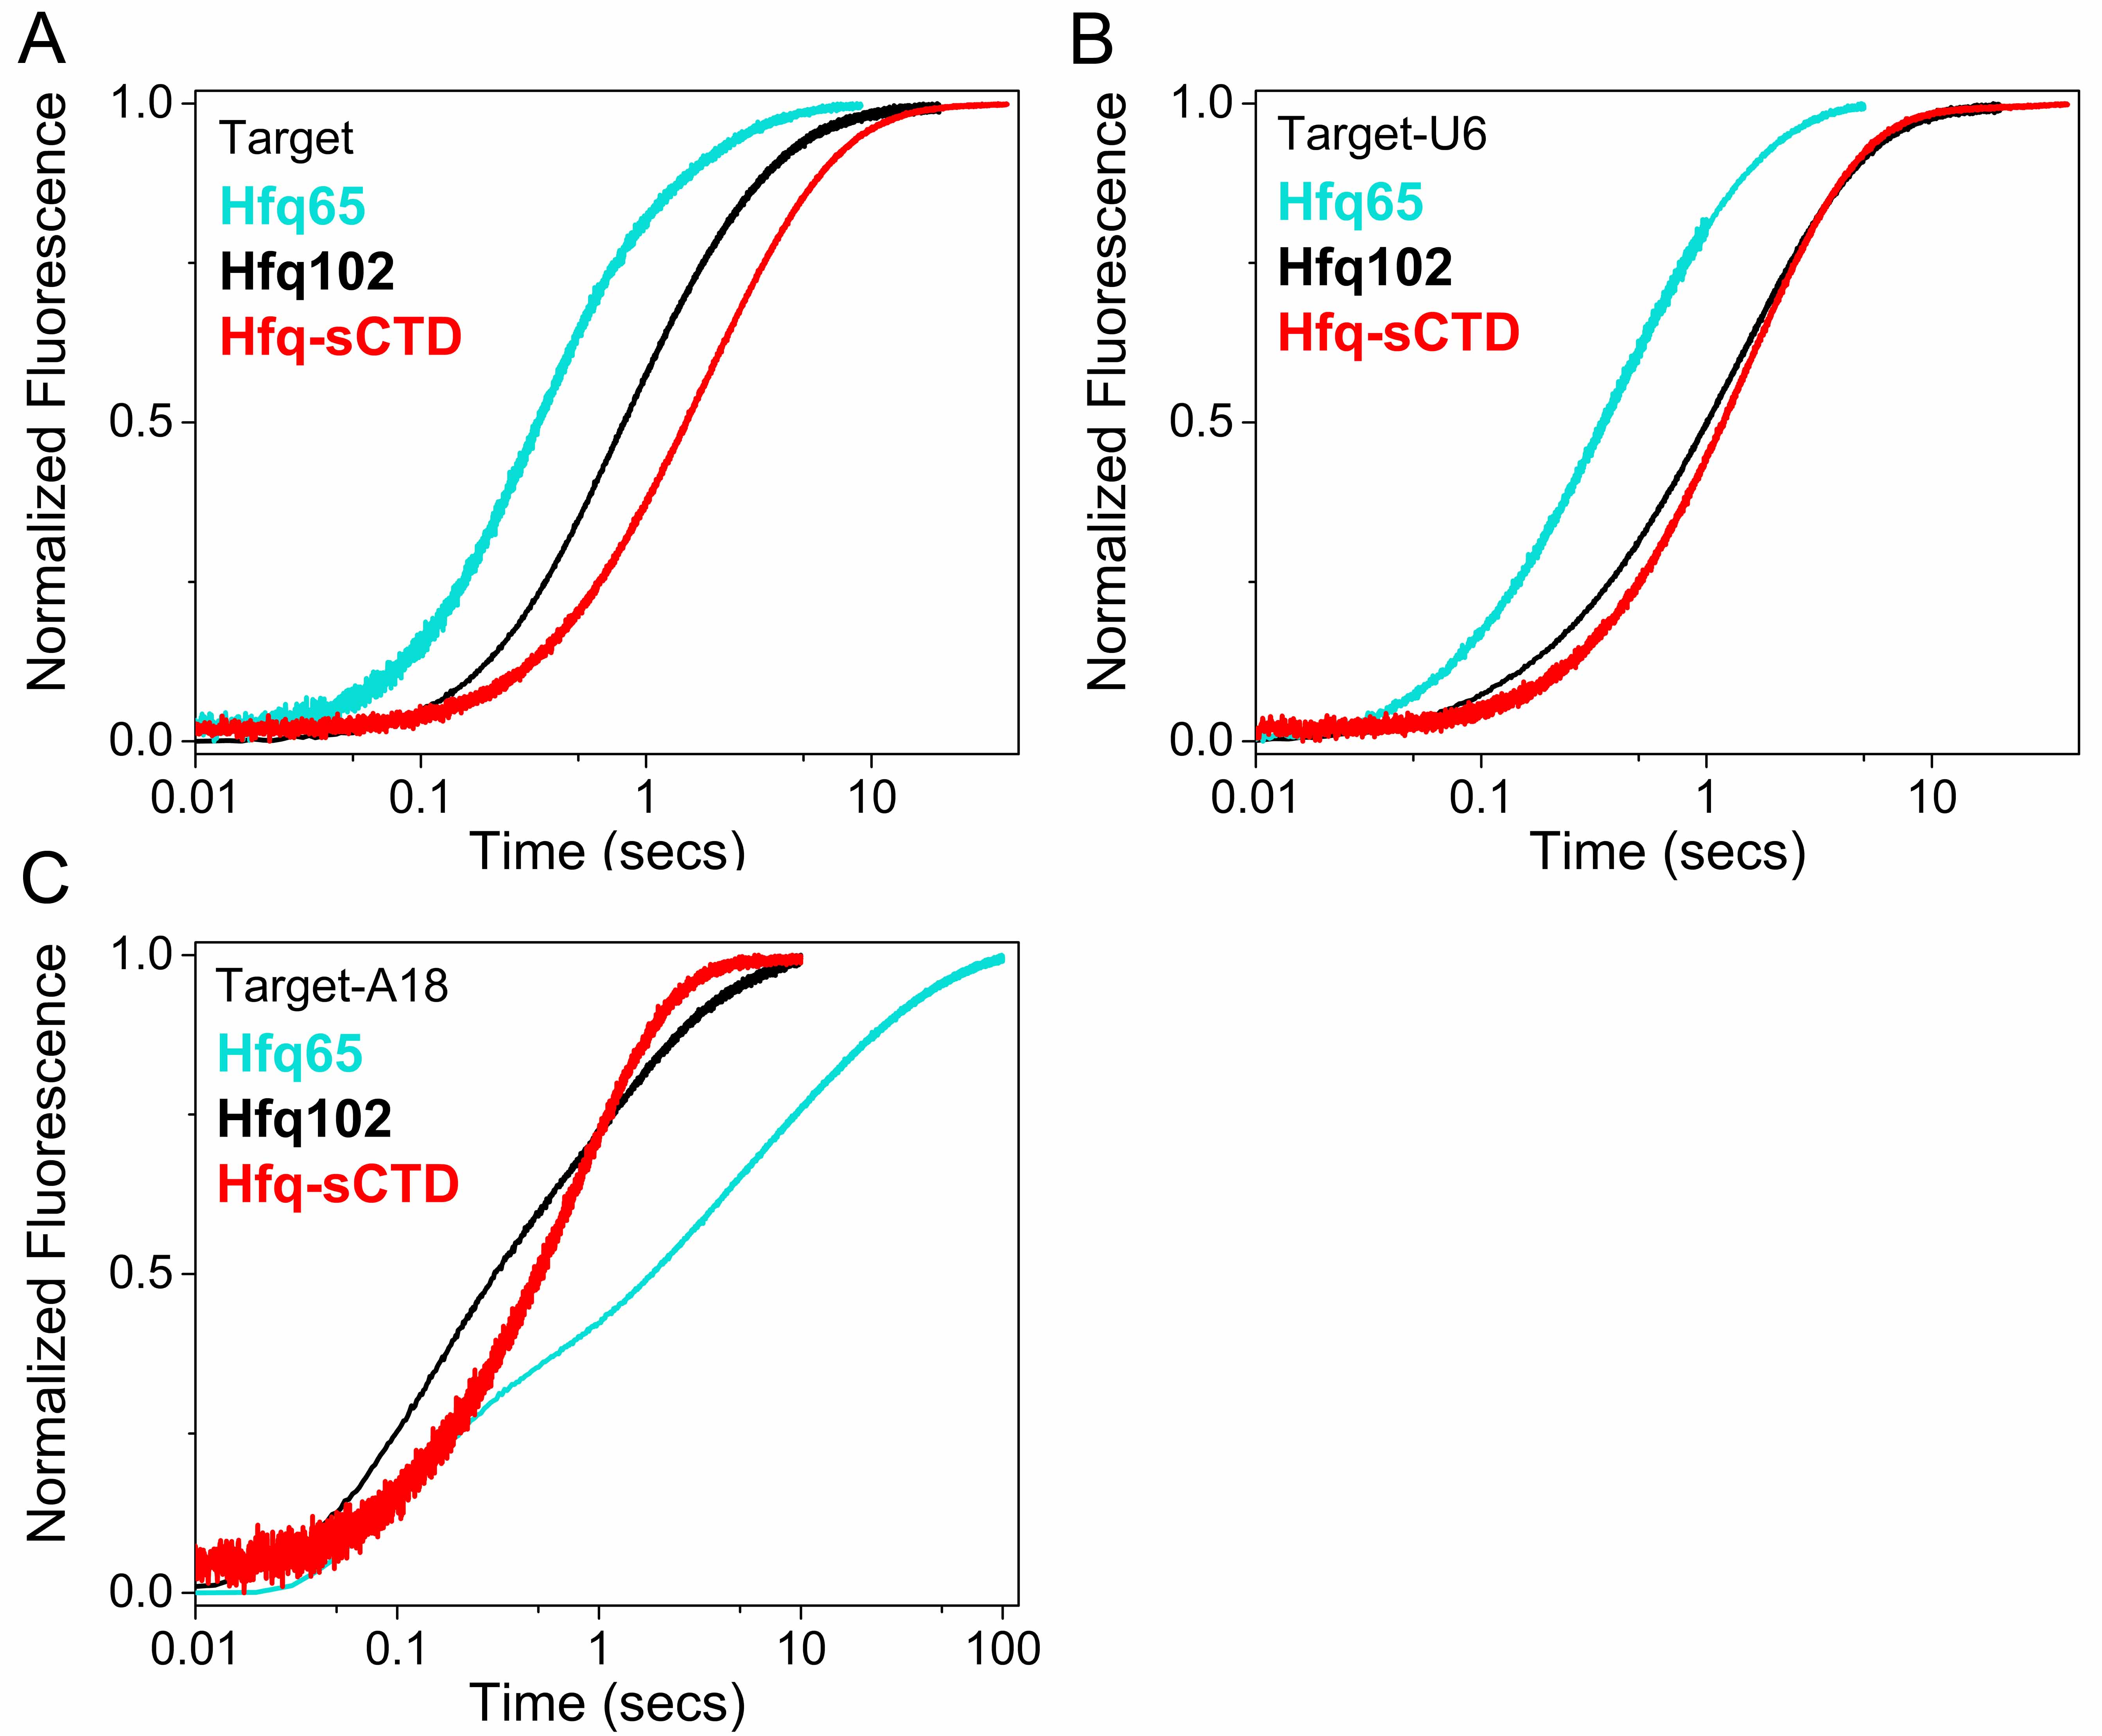

Supplement: supp [file elife-27049-supp-v1.zip › elife_poa_e27049_Figure_4_figure_supplement_1.jpg]

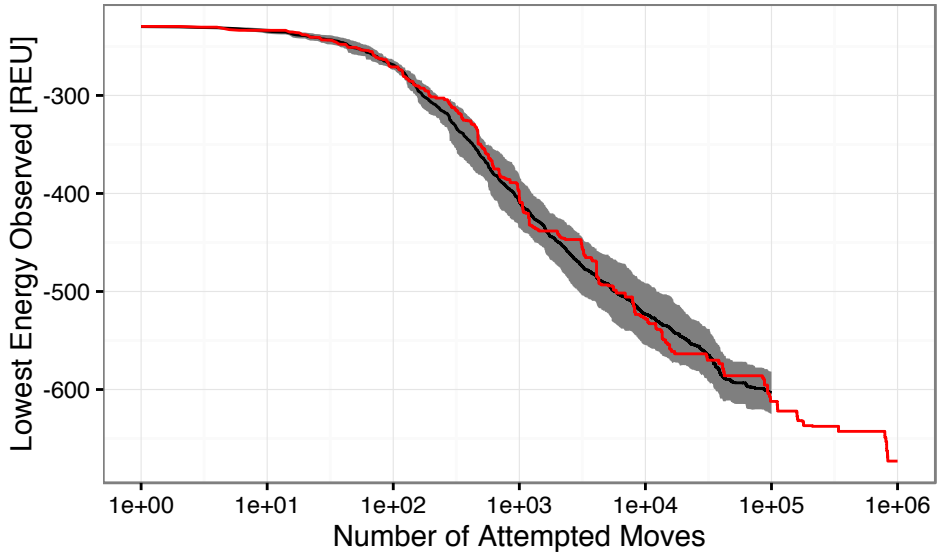

Supplement: supp [file elife-27049-supp-v1.zip › elife_poa_e27049_Figure_1_Figure_Supplement_2.pdf]

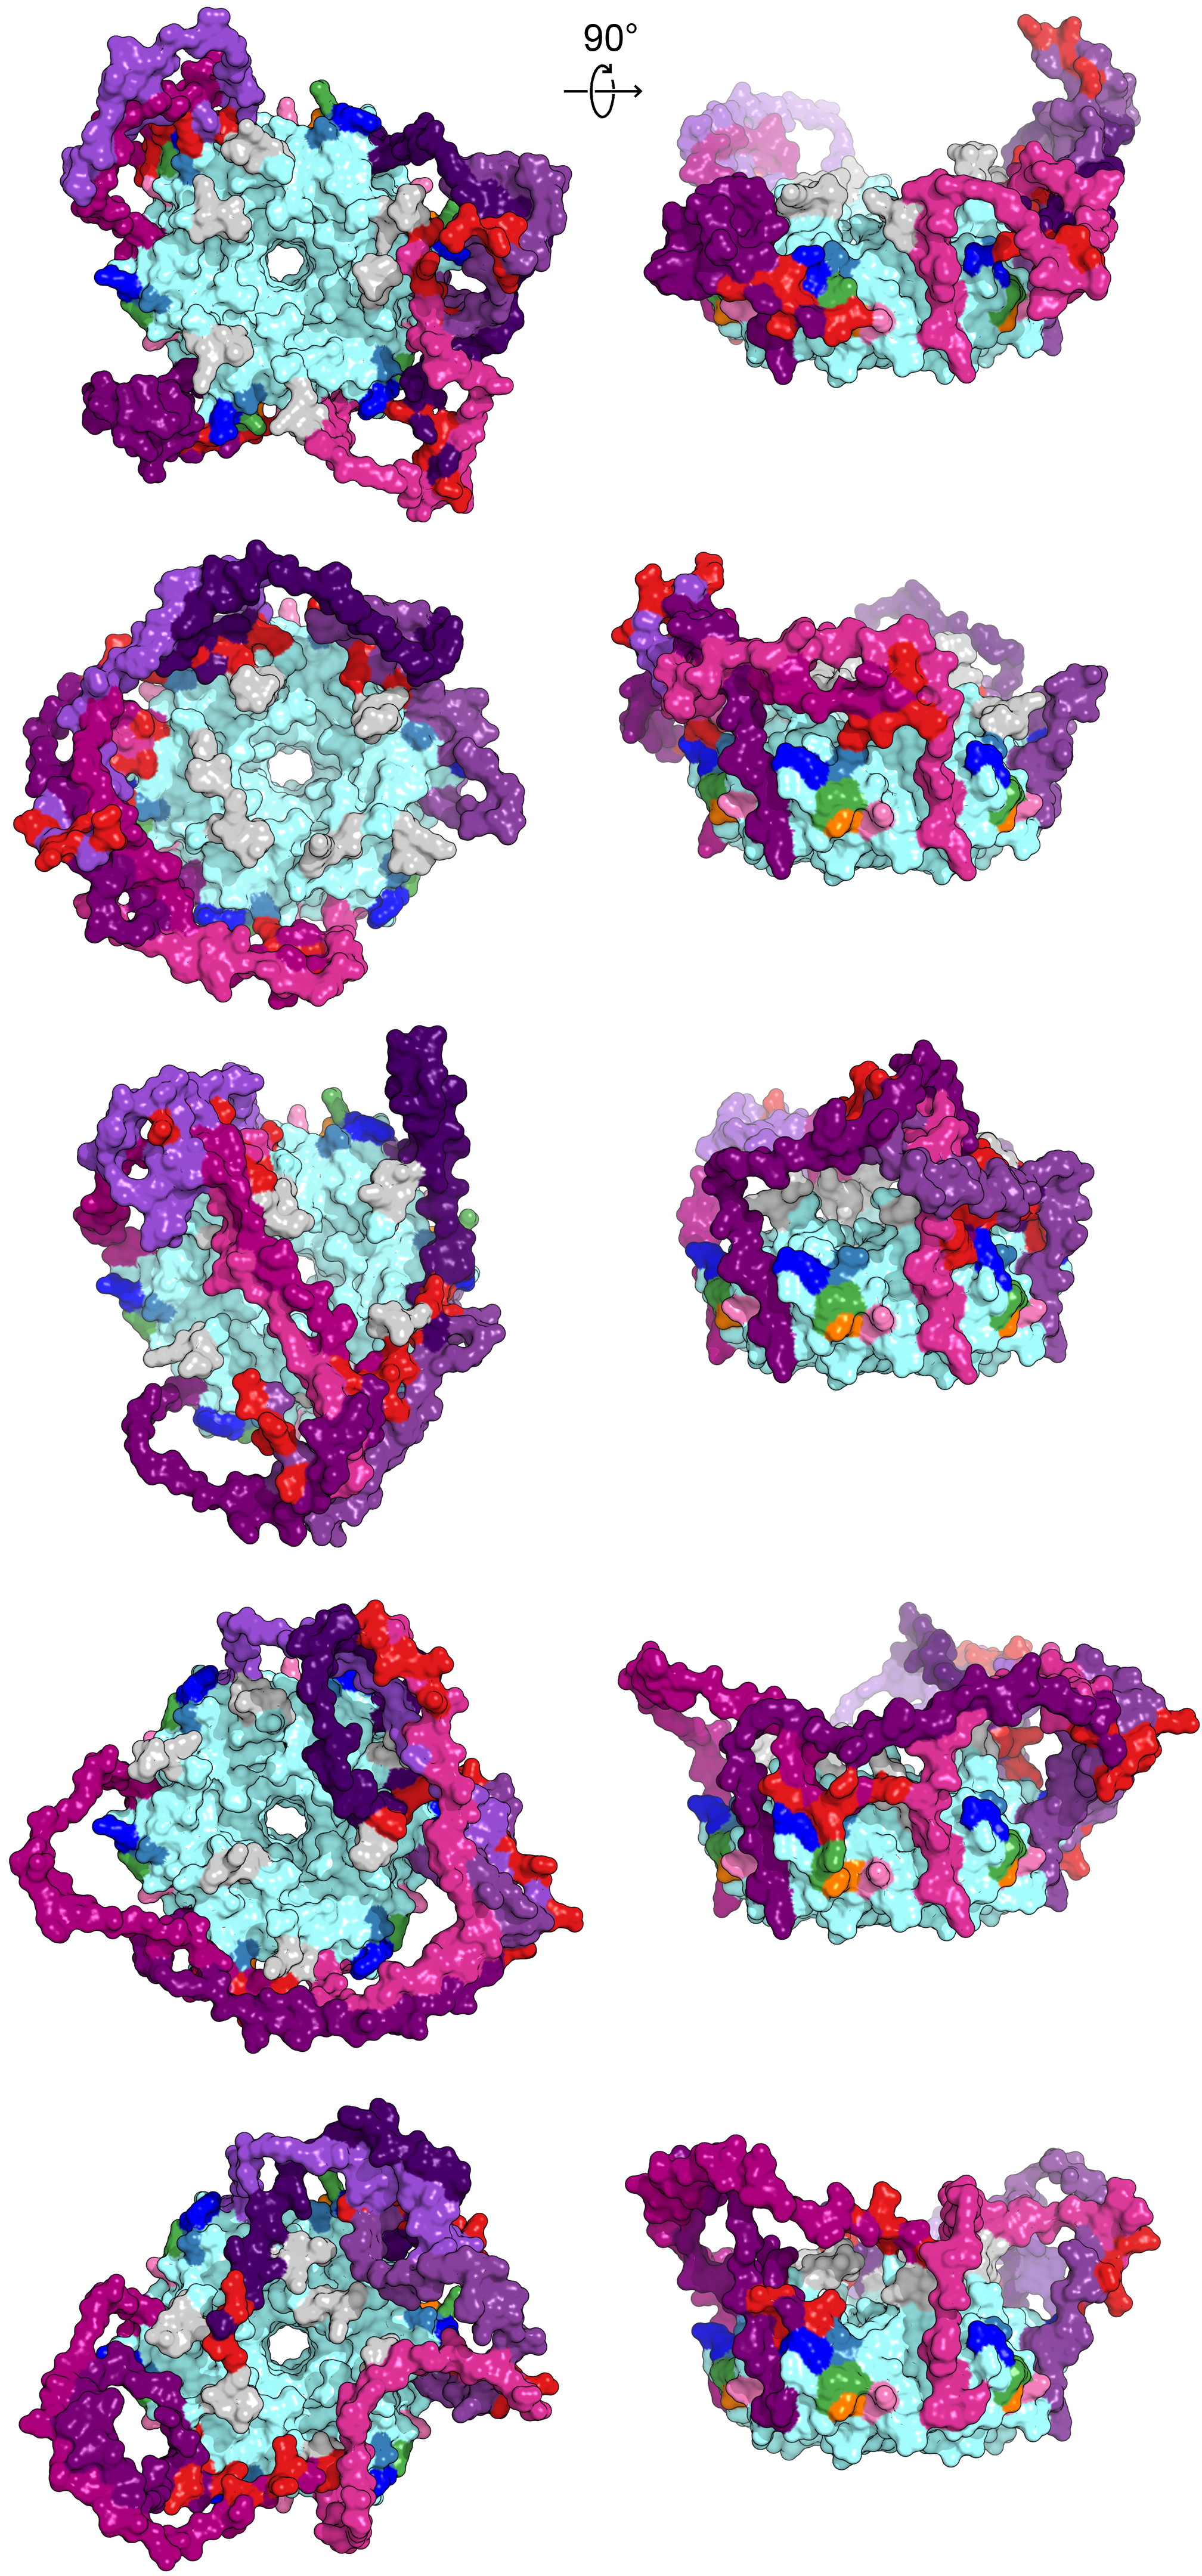

Supplement: supp [file elife-27049-supp-v1.zip › elife_poa_e27049_Figure_1_Figure_Supplement_3.tif]
